# Supplementary material for: Effect of exohedral functionalization on the magnetic properties in the dysprosium-containing endohedral fullerene DySc2N@C80(CF2)
Source: Royal Society of Chemistry journal article supplement (doi:10.1039/d3cp05959f), 2024-01-01
Supplement: d3cp05959f1.pdf [file d3cp05959f1.pdf]

## Supplementary information to the “Effect of exohedral functionalization on the magnetic properties in the dysprosium-containing endohedral fullerene DySc<sub>2</sub>N@C<sub>80</sub>(CF<sub>2</sub>)”

Viktor E. Khinevich, Svetlana M. Sudarkova and Ilya N. Ioffe

1. Cartesian coordinates of the two conformers of DySc<sub>2</sub>N@C<sub>80</sub>(CF<sub>2</sub>)
2. The effect of SOC-Cl space on the relative energy of the lowest Kramers doublets (Table S1).
3. CASSCF vs XMCQDPT2 predictions on the relative energy of the lowest Kramers doublets (Table S2).
4. A survey of the relative energy estimates for some types of electronic states in DySc<sub>2</sub>N@C<sub>80</sub>(CF<sub>2</sub>) (Table S3).

Optimized cartesian coordinates of conformer 1 of DySc<sub>2</sub>N@C<sub>80</sub>(CF<sub>2</sub>)

|   |              |              |              |
|---|--------------|--------------|--------------|
| C | -3.398498520 | 2.281826001  | -0.865964710 |
| C | -3.417180542 | 2.271002712  | 0.565733712  |
| C | -3.883022568 | 0.987874422  | 0.995470181  |
| C | -4.147158008 | 0.203935553  | -0.176999135 |
| C | -3.847765020 | 0.996124869  | -1.344176535 |
| C | -3.435845012 | 0.427582101  | -2.599021197 |
| C | -2.464076625 | 1.198702978  | -3.339793445 |
| C | -1.962249651 | 2.446257643  | -2.807927700 |
| C | -2.411034474 | 3.011786830  | -1.571944505 |
| C | -1.503554795 | 3.810238675  | -0.819169058 |
| C | -1.520646265 | 3.794063648  | 0.613881816  |
| C | -2.439690266 | 2.979311583  | 1.316078126  |
| C | -1.987431000 | 2.388331793  | 2.547754989  |
| C | -2.473670632 | 1.128198502  | 3.021727580  |
| C | -3.386894736 | 0.383034741  | 2.185218961  |
| C | -3.257969233 | -1.024696686 | 2.191976086  |
| C | -3.540451387 | -1.812501187 | 1.030884439  |
| C | -3.942065217 | -1.195530218 | -0.189596414 |
| C | -3.516171987 | -1.777220696 | -1.434864383 |
| C | -3.315535780 | -1.022249244 | -2.660055697 |
| C | -2.208279097 | -1.664373409 | -3.381173100 |
| C | -1.189179323 | -0.875805224 | -4.057524305 |
| C | -1.359035576 | 0.559621603  | -4.050687570 |
| C | -0.208802242 | 1.429414198  | -3.921435273 |
| C | -0.597629703 | 2.593767378  | -3.195389778 |
| C | 0.336614303  | 3.327974753  | -2.404323603 |
| C | -0.142425415 | 3.972596228  | -1.235868046 |
| C | 0.676609653  | 4.093125558  | -0.065789079 |
| C | -0.172401810 | 3.959631754  | 1.084442955  |
| C | 0.285596572  | 3.315828693  | 2.259908565  |
| C | -0.660239935 | 2.572302119  | 3.050140585  |
| C | -0.303464374 | 1.439729925  | 3.885908428  |
| C | -1.464187584 | 0.524365253  | 3.873448509  |
| C | -1.262505966 | -0.908512829 | 3.728359710  |
| C | -2.186564708 | -1.650719761 | 2.926315042  |
| C | -1.818688542 | -2.837528140 | 2.204217769  |
| C | -2.645608437 | -2.929881517 | 1.040339354  |
| C | -2.139861315 | -3.462512420 | -0.177839229 |
| C | -2.597572546 | -2.873351926 | -1.406324934 |
| C | -1.775447291 | -2.793607232 | -2.572686522 |
| C | 1.634412328  | 2.860164760  | 2.286336006  |
| C | 2.007506745  | 1.652462320  | 2.963931687  |
| C | 1.053865662  | 0.917566211  | 3.744777430  |
| C | 1.222508032  | -0.496705921 | 3.698093089  |
| C | 0.089517635  | -1.393116435 | 3.705137889  |
| C | 0.468364945  | -2.574007794 | 2.983589509  |
| C | -0.475400125 | -3.299092240 | 2.190919861  |
| C | -0.017088372 | -3.941654546 | 1.011272322  |
| C | -0.838346452 | -4.017289562 | -0.163626258 |

|    |              |              |              |
|----|--------------|--------------|--------------|
| C  | 0.010759226  | -3.915692999 | -1.316503011 |
| C  | -0.416780573 | -3.264183388 | -2.504524047 |
| C  | 0.549300213  | -2.537943937 | -3.253097153 |
| C  | 0.171438635  | -1.334059088 | -3.945808132 |
| C  | 1.310629502  | -0.450035028 | -3.877006399 |
| C  | 1.136376159  | 0.946456760  | -3.828575750 |
| C  | 2.095651915  | 1.696460111  | -3.093106524 |
| C  | 1.686638234  | 2.879639108  | -2.405380451 |
| C  | 2.503788588  | 3.025790822  | -1.258171023 |
| C  | 1.996455163  | 3.584529684  | -0.051178913 |
| C  | 2.480228236  | 3.017499281  | 1.163349560  |
| C  | 3.474835628  | 1.982178056  | 1.172100014  |
| C  | 3.137577457  | 1.053076714  | 2.259801841  |
| C  | 3.298966015  | -0.389010199 | 2.242029155  |
| C  | 2.304766912  | -1.128905005 | 2.975387518  |
| C  | 1.821148301  | -2.416319653 | 2.560169460  |
| C  | 2.242544309  | -2.987142836 | 1.334162337  |
| C  | 1.336915693  | -3.772567266 | 0.585594083  |
| C  | 1.355033295  | -3.762425752 | -0.847993999 |
| C  | 2.279963595  | -2.964968426 | -1.555255712 |
| C  | 1.891213218  | -2.387592608 | -2.785983941 |
| C  | 2.376348936  | -1.085688020 | -3.158995934 |
| C  | 3.350189864  | -0.353238277 | -2.384368660 |
| C  | 3.202517011  | 1.089674326  | -2.381107136 |
| C  | 3.503459502  | 1.996792900  | -1.256058198 |
| C  | 4.194100460  | 1.707649604  | -0.038439460 |
| C  | 4.554340908  | -0.515233614 | -0.061901576 |
| C  | 3.919605831  | -1.093336093 | 1.110211619  |
| C  | 3.241375429  | -2.268752125 | 0.620950940  |
| C  | 3.260204746  | -2.258593136 | -0.801421258 |
| C  | 3.949850435  | -1.075873351 | -1.253125838 |
| Sc | -0.364069826 | 0.404365900  | 1.926811185  |
| Sc | 2.318887767  | 0.159311068  | -0.064332571 |
| N  | 0.400514602  | 0.084012277  | 0.173342465  |
| C  | 5.326734196  | 0.743840323  | -0.035732560 |
| F  | 6.121551690  | 0.885605075  | -1.117494192 |
| F  | 6.090629887  | 0.855826789  | 1.072924572  |
| Dy | -1.109233678 | -0.229576665 | -1.516236683 |

Optimized cartesian coordinates of conformer 2 of DySc<sub>2</sub>N@C<sub>80</sub>(CF<sub>2</sub>)

|   |              |              |              |
|---|--------------|--------------|--------------|
| C | -3.397197223 | 2.227759058  | -0.716962360 |
| C | -3.398316590 | 2.228066893  | 0.709165100  |
| C | -3.839850369 | 0.933116528  | 1.165180081  |
| C | -4.111725129 | 0.140484051  | -0.003966112 |
| C | -3.837988422 | 0.932543666  | -1.173166282 |
| C | -3.412370479 | 0.356082298  | -2.420358598 |
| C | -2.506420301 | 1.133272119  | -3.254715023 |
| C | -1.975549037 | 2.359431340  | -2.690151219 |
| C | -2.412282657 | 2.944444205  | -1.446974516 |
| C | -1.489854795 | 3.739394753  | -0.720822101 |
| C | -1.490963007 | 3.739654155  | 0.715425182  |
| C | -2.414528041 | 2.945029987  | 1.440444753  |
| C | -1.979658772 | 2.360594933  | 2.684558594  |
| C | -2.511352538 | 1.134689557  | 3.248794423  |
| C | -3.415595999 | 0.357130517  | 2.413022587  |
| C | -3.234075903 | -1.067369421 | 2.401070352  |
| C | -3.492537557 | -1.858093593 | 1.220584093  |
| C | -3.915890209 | -1.263292885 | -0.003479126 |
| C | -3.490677128 | -1.858600187 | -1.226691307 |
| C | -3.230729978 | -1.068530615 | -2.407376816 |
| C | -2.140870019 | -1.708681152 | -3.123345730 |
| C | -1.179131202 | -0.950999491 | -3.873256925 |
| C | -1.394137620 | 0.481566985  | -3.970940570 |
| C | -0.229056871 | 1.328254656  | -3.811746572 |
| C | -0.605854615 | 2.488354456  | -3.071660078 |
| C | 0.341417079  | 3.241212731  | -2.313790080 |
| C | -0.130725037 | 3.900580971  | -1.157369020 |
| C | 0.705023925  | 4.029067790  | -0.001035151 |
| C | -0.132519762 | 3.901063681  | 1.154052549  |
| C | 0.337836219  | 3.242265389  | 2.311523929  |
| C | -0.610613301 | 2.489735141  | 3.068297665  |
| C | -0.235054415 | 1.330059840  | 3.809742954  |
| C | -1.400450707 | 0.483394107  | 3.967624550  |
| C | -1.185259220 | -0.949281035 | 3.870708068  |
| C | -2.145575995 | -1.707221167 | 3.119243105  |
| C | -1.761443929 | -2.878464750 | 2.374579893  |
| C | -2.596323830 | -2.970807275 | 1.218430100  |
| C | -2.110398185 | -3.531523114 | -0.001546875 |
| C | -2.594374337 | -2.971238903 | -1.222527596 |
| C | -1.757730877 | -2.879447920 | -2.377431233 |
| C | 1.689331310  | 2.793466382  | 2.335064149  |
| C | 2.094754672  | 1.605090212  | 3.015489029  |
| C | 1.123113734  | 0.847971919  | 3.727800703  |
| C | 1.307863987  | -0.543703506 | 3.768704349  |
| C | 0.166411966  | -1.423700494 | 3.807789705  |
| C | 0.541229319  | -2.617290409 | 3.106817051  |
| C | -0.413511337 | -3.346275861 | 2.342412970  |
| C | 0.032666190  | -3.996890662 | 1.162035750  |
| C | -0.803850073 | -4.079690346 | -0.000416899 |

|    |              |              |              |
|----|--------------|--------------|--------------|
| C  | 0.034478915  | -3.997361723 | -1.161599247 |
| C  | -0.409846893 | -3.347284363 | -2.342986903 |
| C  | 0.546103994  | -2.618696672 | -3.106226962 |
| C  | 0.172402410  | -1.425436401 | -3.808332570 |
| C  | 1.313767736  | -0.545426527 | -3.767941692 |
| C  | 1.128964878  | 0.846259643  | -3.727820974 |
| C  | 2.099449547  | 1.603733126  | -3.014346828 |
| C  | 1.692947457  | 2.792403556  | -2.335056125 |
| C  | 2.533288384  | 2.953761347  | -1.206642687 |
| C  | 2.028602277  | 3.515941697  | 0.000101148  |
| C  | 2.531453191  | 2.954334494  | 1.207893939  |
| C  | 3.551818277  | 1.939840399  | 1.220256999  |
| C  | 3.236555648  | 1.015364981  | 2.333102551  |
| C  | 3.385656184  | -0.435795622 | 2.322620696  |
| C  | 2.385173966  | -1.171809728 | 3.059031765  |
| C  | 1.890797840  | -2.466888862 | 2.662515178  |
| C  | 2.303581131  | -3.048662977 | 1.441986590  |
| C  | 1.384009416  | -3.843839562 | 0.718089795  |
| C  | 1.385124744  | -3.844163826 | -0.715632393 |
| C  | 2.305822053  | -3.049284766 | -1.438448390 |
| C  | 1.894981353  | -2.468096608 | -2.659894435 |
| C  | 2.389981076  | -1.173215992 | -3.056316330 |
| C  | 3.389163159  | -0.436842813 | -2.318559254 |
| C  | 3.240107597  | 1.014288881  | -2.329906852 |
| C  | 3.553587026  | 1.939172377  | -1.216928408 |
| C  | 4.253998804  | 1.661213369  | 0.002230339  |
| C  | 4.591847195  | -0.582180680 | 0.002987357  |
| C  | 3.985450990  | -1.155499049 | 1.185208435  |
| C  | 3.306534749  | -2.341756970 | 0.714594212  |
| C  | 3.307593090  | -2.342022700 | -0.709787789 |
| C  | 3.987173970  | -1.155949853 | -1.179839408 |
| Sc | -1.181688326 | 0.132429125  | 1.745392588  |
| Sc | -1.181413019 | 0.131153789  | -1.747330122 |
| N  | -0.334688752 | 0.119164415  | -0.000901261 |
| C  | 5.362685661  | 0.674788741  | 0.003319906  |
| F  | 6.143881820  | 0.794573043  | -1.093226219 |
| F  | 6.142147788  | 0.795048163  | 1.101045882  |
| Dy | 1.969564575  | 0.129207689  | 0.001174991  |

Table S1. Relative energy (in  $\text{cm}^{-1}$ ) of the lowest Kramers doublets in  $\text{DySc}_2\text{N@C}_{80}\text{CF}_2$  (conformer 1) depending on the selection of states for the SOC-CI computation.

| Kramers doublet | Sextet states only | Sextet + quartet states | Sextet + octet states | Sextet + quartet + octet states |
|-----------------|--------------------|-------------------------|-----------------------|---------------------------------|
| 1               | 0                  | 0                       | 0                     | 0                               |
| 2               | 413                | 411                     | 418                   | 411                             |
| 3               | 709                | 707                     | 715                   | 707                             |
| 4               | 932                | 929                     | 938                   | 929                             |
| 5               | 1090               | 1088                    | 1097                  | 1088                            |
| 6               | 1210               | 1207                    | 1218                  | 1207                            |
| 7               | 1293               | 1285                    | 1301                  | 1285                            |
| 8               | 1386               | 1377                    | 1396                  | 1378                            |

Table S2. XMCQDPT2 vs CASSCF relative energy ( $\text{cm}^{-1}$ ) of the lowest Kramers doublets in the two conformers of  $\text{DySc}_2\text{N@C}_{80}\text{CF}_2$ ,  $M_S$  value, and spin magnetization angles with respect to the Dy-N bond.

| Kramers<br>doublet | Sc- $\text{CF}_2$ conformer |          |       |                | Dy- $\text{CF}_2$ conformer |          |       |                |
|--------------------|-----------------------------|----------|-------|----------------|-----------------------------|----------|-------|----------------|
|                    | CASSCF                      | XMCQDPT2 | $M_S$ | Angle,<br>deg. | CASSCF                      | XMCQDPT2 | $M_S$ | Angle,<br>deg. |
| 1                  | 0                           | 0        | 2.25  | 7.4            | 0                           | 0        | 2.41  | 0.3            |
| 2                  | 411                         | 493      | 1.53  | 9.6            | 255                         | 315      | 1.62  | 2.2            |
| 3                  | 707                         | 839      | 1.20  | 9.2            | 503                         | 606      | 1.48  | 1.2            |
| 4                  | 929                         | 1091     | 0.86  | 5.7            | 706                         | 844      | 1.12  | 3.5            |
| 5                  | 1088                        | 1270     | 0.98  | 8.0            | 845                         | 1003     | 0.98  | 8.8            |
| 6                  | 1207                        | 1405     | 0.15  | 31.7           | 928                         | 1094     | 0.97  | 36.4           |
| 7                  | 1285                        | 1500     | 1.02  | 18.2           | 991                         | 1156     | 1.64  | 44.7           |
| 8                  | 1378                        | 1604     | 2.29  | 12.9           | 1006                        | 1196     | 1.96  | 42.8           |

Table S3. A survey of the relative energy estimates (w.r.t. the ground state) for some types of electronic states in DySc<sub>2</sub>N@C<sub>80</sub>(CF<sub>2</sub>) (see the main text for more detail)

| Type of the state                                                                                | Relative energy |
|--------------------------------------------------------------------------------------------------|-----------------|
| 4f <sup>9</sup> sextet states of Dy <sup>3+</sup> and the ground state of the fullerene subunit  | 0 – 4 eV        |
| 4f <sup>9</sup> quartet states of Dy <sup>3+</sup> and the ground state of the fullerene subunit | from ca. 3.0 eV |
| 4f <sup>8</sup> 5d <sup>1</sup> states of Dy <sup>3+</sup>                                       | from ca. 4.3 eV |
| Lowest excitations in the fullerene subunit                                                      | from ca. 1.5 eV |
| Excitations from the fullerene subunit into the 4f-shell (4f <sup>10</sup> )                     | from ca. 4 eV   |
| Excitations from the 4f-shell into the fullerene subunit (4f <sup>8</sup> )                      | above 5 eV      |
